# Supplementary material for: The Plasmodium falciparum rhoptry protein RhopH3 plays essential roles in host cell invasion and nutrient uptake
Source: eLife journal article supplement (doi:10.7554/elife.23239), 2017-03-02
Supplement: supp [file elife-23239-supp-v1.zip]

Archive with 5 entries (5 files):
- elife_poa_e23239_Supplementary_Video_1.mov
- elife_poa_e23239_Figure_2_Supplement_1.pdf
- elife_poa_e23239_Figure_1_Supplement_3.pdf
- elife_poa_e23239_Figure_1_Supplement_1.pdf
- elife_poa_e23239_Figure_1_Supplement_2.pdf
