# Supplementary material for: The Plasmodium falciparum rhoptry protein RhopH3 plays essential roles in host cell invasion and nutrient uptake
Source: eLife journal article supplement (doi:10.7554/elife.23239), 2017-03-02
Supplement: supp [file elife-23239-supp-v1.zip › elife_poa_e23239_Figure_1_Supplement_1.pdf]

*P. falciparum* MRSKHLVTLFTIITFLSFSTVKVWGKDVAGFVTKKLKTLDCNFALYYNFKGNGPDAGSF  
*P. chabaudi* MPTNSLTSLKFLASLSTFSVSQVWGKDYFSGSLNQNLTDILKCNFISYYNSKPGEPDPNAF  
*P. vivax* MRSKFLVTLFTICTVLTLSSVQVLGREYFSGFVNKKLKNLLQCNLAAYYNLNDNGDPDNFAF  
 \* : : : \* : : : \* : : \* : : \* : : \* : : \* : : \* : : \* : : \*

*P. falciparum* LDFVDEPEQFYWFVEHFLSVKFRVPKHLKDKNIHNFTPCLNRSWSVEFLKEYEEFPVNPV  
*P. chabaudi* LDFVGEPEQFYWFVENYLSVPFTVPQHLSSNSGHNWKSCLKKKWVEFLKEYEEPEVSYL  
*P. vivax* LDFVGEPEQFYWFIEHYLSVPFISIPRNKKNNKSHSYWSCINRSWSVEFLRKYEEPDLNEL  
 \*\*\*\* \* : : : \* : : \* : : \* : : \* : : \* : : \* : : \* : : \*

*P. falciparum* MKFLDKEQRLFFTYNFGDVEPQGKYTFPVPEKFHKYCILPLIKTNIKDGESGEFLKYQL  
*P. chabaudi* ASVLDKPRGHYKIDTFGDGVEPKVAKYTFEVEKFDSCYLLPPFVKTNIRSKNSKENLSPFM  
*P. vivax* MKFLDKEQVRVFSYTFQNIIEPVAKYTSFPIKEFHKYCVLPPLIETNIKQKDKGGNLSFQ  
 . : : : \* : : \* : : \* : : \* : : \* : : \* : : \* : : \*

*P. falciparum* NKEEYKVLSSVSGSQMTAIKNLYSTVEDEQRKQLLKVIENESTNDISVQCPTYNIKHLHY  
*P. chabaudi* DKTDYQTYLEVDPNKYAAAMKHLSTNMEYGEKQEIIVKAIIVESNNENSQILICPSYYIKIHY  
*P. vivax* NQAEYKIYLSVSGTPTSLAKNLYNMDEGERKNIVKTIVENERSNNVFNVCPYVDLKLHY  
 : : : \* : : \* : : \* : : \* : : \* : : \* : : \* : : \*

*P. falciparum* NTECKPNSNILTICIDDIYKNTCIDAVKND-EDPTICDHLLNLFNSLKDFQIESFQKFLTA  
*P. chabaudi* TKECANSNNILKCIDEFLRKTCCKTESKHPSADLCEHLQFLFESLKNPYLDNFKKFMTN  
*P. vivax* NKECGSQPNVLKCLDDYIKHLCCERRIAHR-EKGTFCDDLLFLFDALKEPYVENFKKFLSR  
 . : : \* : : \* : : \* : : \* : : \* : : \* : : \* : : \*

*P. falciparum* SDFTLIKPQSVWNPVIFDIYKPKNYLSDVQNLDETCFKKLSKNLIFLSFHDDIPNNPY  
*P. chabaudi* DELQLTQPRGWHYKIDTFGDGVEPKVAKYTFEVEKFDSCYLLPPFVKTNIRSKNSKENLSPFM  
*P. vivax* DDVHLVKPQSVWGIPLFTTYKPRDLKNPKNVPLNVFKVLNSKNKFLSFFDEIPKSPYY  
 . : : \* : : \* : : \* : : \* : : \* : : \* : : \* : : \*

*P. falciparum* NVELQEIVKLSTYT-YISIFDKLYNFFVFKKSGAPISPVSVKELSHNITDIFSFKEDNSEI  
*P. chabaudi* VDNVSIYFKLRNYSSSSVFDTFQNIIFSVPFKKKTPAIPVSVKEVSQIDIDNEFFKAPKKPI  
*P. vivax* MEESQPLVKLSDF-SSIFDKLHRFFVFKKGNQISPVSVKELSHNIDFSFKHDTNSI  
 : : . \* : : \* : : \* : : \* : : \* : : \* : : \* : : \*

*P. falciparum* QCQNVKSLDLEVDVETMKGIAAEKLCIKIEKFIILTKDDAS---K-----PEKSDIHRGF  
*P. chabaudi* QCIGVKKSLDLSIDVDIFKVASVEKICSVIDKYALTEDSDFNKVPTEKKMKDLKLLKGF  
*P. vivax* ECKVKKSLNLELEVEVAKGVAEEKICNLIEGFVLTKGKKDKTIR----GEVDDVHKGF  
 : \* : : \* : : \* : : \* : : \* : : \* : : \* : : \* : : \*

*P. falciparum* RILCILISTHVEAYNIVRQLLNMESMISLTRYTSLYIHKFFKSVTLKGNFLYKNNKAIR  
*P. chabaudi* HIDCILVSTYVEGYNLIRQLFNLENVLISLTRYTSLYTHKFLKSVTLKEHFLYQKNAIG  
*P. vivax* RIQCILIAITHVEALNIVRQLLNMESMISLTRYTSLYLHKFFKSVTALKGSFLYENPSAIR  
 : \* : : \* : : \* : : \* : : \* : : \* : : \* : : \* : : \*

*P. falciparum* YSRACSKASLHVPSVLYRRNIYIPETFLSLYLGLSNLVSSNPSSPFFEYAIIEFLVITYYN  
*P. chabaudi* YAKSCGSVLYIPVSMYRRNLYIPETFLSLYLGLSNLVSSNPSSPFFEYAIIDFLITYFN  
*P. vivax* HARACGAVLHVPAVLYRRNIYLAETFLSLYLGLSNLVSSNPSSPFFEYAIIEFLVITYFN  
 : : : \* . \* : : \* : : \* : : \* : : \* : : \* : : \* : : \* : : \*

*P. falciparum* KGSEKFLVLYFISIIISVLYINEYYYEQLSFCYPKEFLIKSRMIHPNIVDRILKGIDNLMK  
*P. chabaudi* KGTKKFLYFISIIISILHINRYYYEQIYCHNNHFDTLKSKMIHPDVKGIMKKLRSILN  
*P. vivax* KGSEKFLLYLFSIIVSVLYINIIYYYEQLYCHHREQFELLRSKMIHPNIDRIENIKTLIK  
 \* : : : \* : : \* : : \* : : \* : : \* : : \* : : \* : : \*

*P. falciparum* STRYDKMRTMYLDFESSDIFSREKVFTALYNFDSFIKTNEQLKKKNLEEISEIPVQLETS  
*P. chabaudi* KPKYSKMMELYKKLESETLFNYDENAKILFEFDEFQAKNDVQEKAKQITIDEKEPEVNTL  
*P. vivax* NPRYMKMRTFYMKFDNEDMFDKRVFVLYSFDEFSSDAQQAQKAKMQDISDESVDLDTT  
 . : \* \* : : \* : : . \* : : \* : : \* : : \* : : \* : : \*

*P. falciparum* NDGIGYRKQDVLVYETDKPQTMDEASYEETVDEDA---HHV-NEKQSAHFLDAIAEKDILE  
*P. chabaudi* EEMANYNE-EWLPLKTRP-----TIPHPDYPENPNPIKFDENVRSQGNLT  
*P. vivax* NDGIGLRKEDALFESEQGSMEISIED---IDEGLEGVDP-NQOKKTAELYLMKVPDEKCAN  
 : : : . : \* : : \* : : \* : : \* : : \* : : \* : : \*

*P. falciparum* EKTQDQDLEIELYKMGPLKEQSKSTSAAST-SDEISG-----SEGPSTESTSTGNQG  
*P. chabaudi* LADRKELELSLFKYIGSLPADKTASTTEDHTASPTEDHAASTTEDHAASTTEDHAGSTT  
*P. vivax* LTDRNKELELDLYKIIGTLNETSAGVGTST-HSPATAARMGLNAGGGRAVRPAA---KG  
 : : : : \* : : \* : : \* : : \* : : \* : : \* : : \*

*P. falciparum* EDKTTDNTYKEMEELEEAEGTSLNKKGLEFYKSSSLKLDQLDKEKPKKKKSKRKKKRDSSS  
*P. chabaudi* ES-----QTLDAFDENVKPTDAEMKT-----ASKEHLNTLTDPTDNNDRSSSYT-----  
*P. vivax* LHQRMGMKGKDLK-RMKGKDTSKLRKGVDFYESSTSLNQISPGESATEGKGSST-----  
 : : : . : \* : : \* : : \* : : \* : : \* : : \* : : \*

*P. falciparum* DRILLEESKTFTSENEL-----  
*P. chabaudi* ----NEDDRSEISEPEFQHTAPEFYQDENL  
*P. vivax* -NVSTEG--TSPSE--  
 \* : \*
