# Supplementary figures and images for: The Plasmodium falciparum rhoptry protein RhopH3 plays essential roles in host cell invasion and nutrient uptake
Source: eLife journal article supplement (doi:10.7554/elife.23239), 2017-03-02

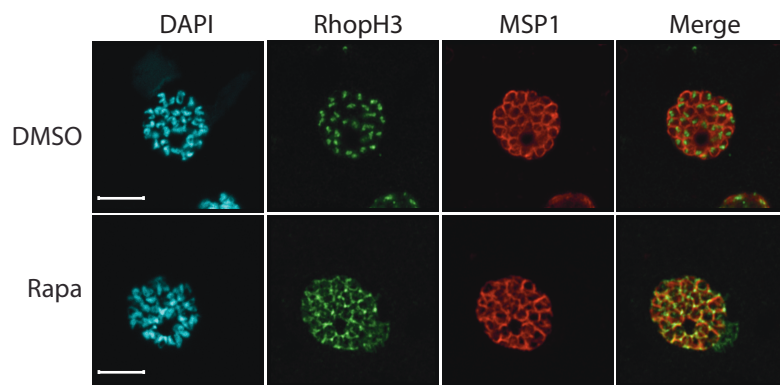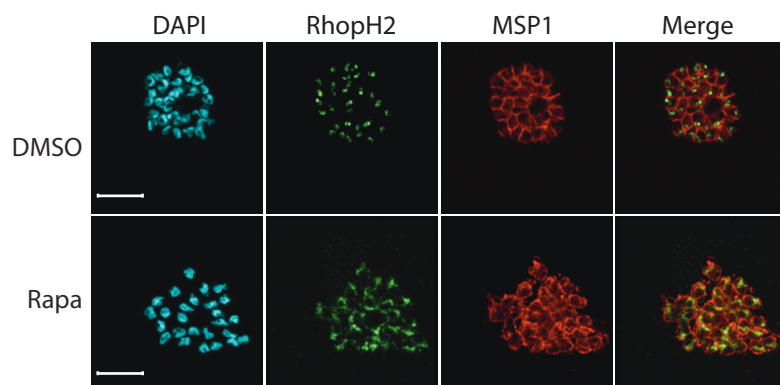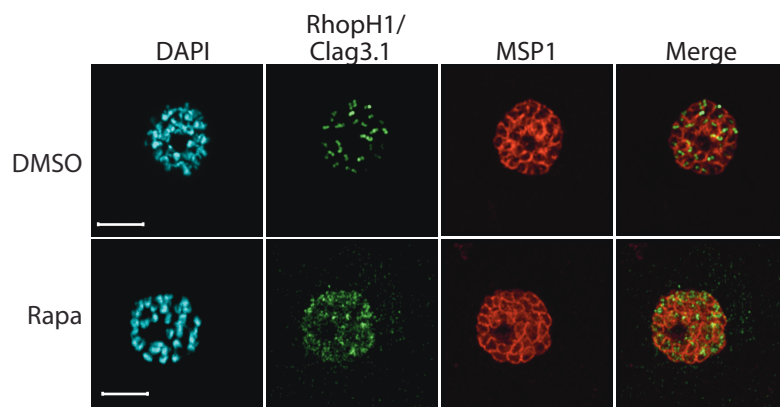

Supplement: supp [file elife-23239-supp-v1.zip › elife_poa_e23239_Figure_2_Supplement_1.pdf]

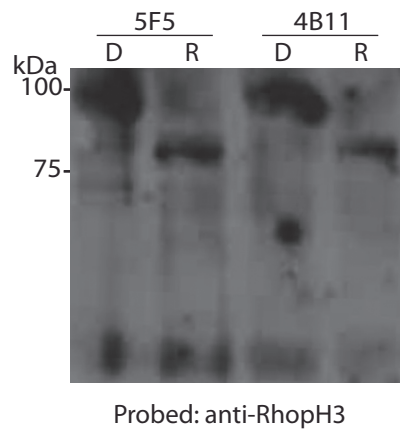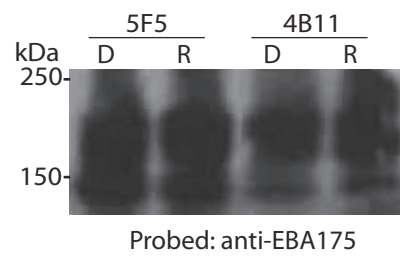

Supplement: supp [file elife-23239-supp-v1.zip › elife_poa_e23239_Figure_1_Supplement_3.pdf]

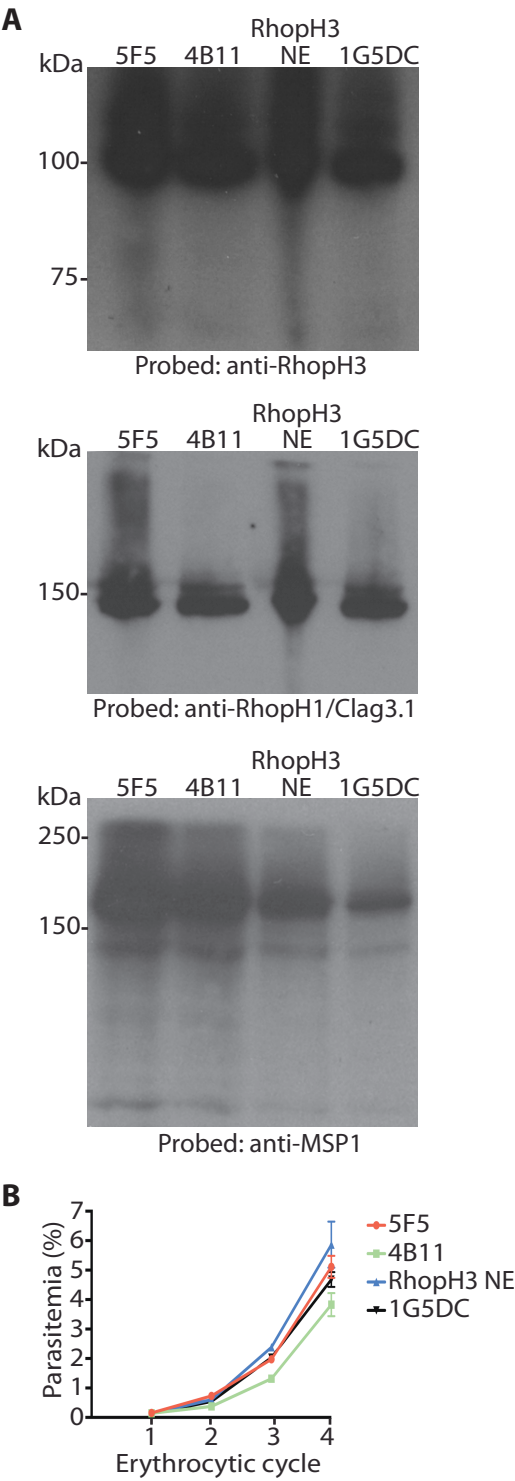

Supplement: supp [file elife-23239-supp-v1.zip › elife_poa_e23239_Figure_1_Supplement_2.pdf]
